1  
2 **Title**

3  
4 **A Multiparametric and High-Throughput Platform for Host-Virus Binding**  
5 **Screens**

6 **Authors**

7 Jan Schlegel<sup>1</sup>, Bartłomiej Porebski<sup>2</sup>, Luca Andronico<sup>1</sup>, Leo Hanke<sup>3</sup>, Steven Edwards<sup>4</sup>, Hjalmar  
8 Brismar<sup>1,4</sup>, Benjamin Murrell<sup>3</sup>, Gerald McInerney<sup>3</sup>, Oscar Fernandez-Capetillo<sup>2,5</sup>, Erdinc Sezgin<sup>1\*</sup>

9  
10 **Affiliations**

11 <sup>1</sup> Science for Life Laboratory, Department of Women's and Children's Health, Karolinska  
12 Institutet, 17165, Solna, Sweden.

13 <sup>2</sup> Science for Life Laboratory, Division of Genome Biology, Department of Medical  
14 Biochemistry and Biophysics, Karolinska Institutet, Stockholm, Sweden.

15 <sup>3</sup> Department of Microbiology, Tumor and Cell Biology, Karolinska Institutet, Stockholm,  
16 Sweden.

17 <sup>4</sup> Science for Life Laboratory, Department of Applied Physics, Royal Institute of  
18 Technology, Solna, Sweden.

19 <sup>5</sup> Genomic Instability Group, Spanish National Cancer Research Centre (CNIO), Madrid,  
20 28029, Spain.

21  
22 \* Corresponding author: Erdinc Sezgin, Email: [erdinc.sezgin@ki.se](mailto:erdinc.sezgin@ki.se)

23  
24 **Abstract**

25 Speed is key during infectious disease outbreaks. It is essential, for example, to identify critical host  
26 binding factors to the pathogens as fast as possible. The complexity of host plasma membrane is  
27 often a limiting factor hindering fast and accurate determination of host binding factors as well as  
28 high-throughput screening for neutralizing antimicrobial drug targets. Here we describe a multi-  
29 parametric and high-throughput platform tackling this bottleneck and enabling fast screens for host  
30 binding factors as well as new antiviral drug targets. The sensitivity and robustness of our platform  
31 was validated by blocking SARS-CoV-2 spike particles with nanobodies and IgGs from human  
32 serum samples.

33  
34 **Teaser**

35 A fast screening platform tackling host-pathogen interactions.  
36  
37  
38  
39  
40  
41  
42  
43  
44

## 45 MAIN TEXT

### 46 Introduction

47 Emerging microbial pathogens, such as bacteria, fungi and viruses, tremendously challenge human  
48 health and cause significant economical and societal burden worldwide. Therefore, tools facilitating  
49 and improving pandemic preparedness are of uttermost importance to minimize these negative  
50 effects. Current state-of-the-art methods, such as enzyme-linked immunosorbent assay (ELISA),  
51 reverse transcription-polymerase chain reaction (RT-PCR) and RT loop-mediated isothermal  
52 amplification (RT-LAMP) usually rely on bulk measurements resulting in a single readout-value  
53 (1). In addition, during the peaks of SARS-CoV-2 pandemic, RT-PCR instruments were used to  
54 capacity slowing down pandemic surveillance and highlighting the need for additional readout-  
55 systems. Especially flow cytometry, enabling fast and high-throughput measurements of complex  
56 mixtures, is widely used in clinics for immunophenotyping and would be an attractive and broadly  
57 available technique for such purposes (2).

58 To complement existing bulk measurement methods, we aimed to develop a fast and high-  
59 throughput platform to study host-pathogen interactions. The system should not only reconstitute  
60 host cell proteins, but also the lipid bilayer, which is mostly neglected in current state-of-the-art  
61 methods but often hosts important attachment factors. However, the complexity of the mammalian  
62 plasma membrane consisting of thousands of different lipids and proteins embedded between an  
63 outer glycocalyx and inner cortical cytoskeleton is overwhelming. This complexity not only slows  
64 down our efforts to identify important interaction partners but also obscures specific interactions  
65 between host and pathogen due to the plenitude of involved molecules and interactions. To  
66 overcome this bottleneck and reduce complexity, bottom-up model membrane systems are  
67 attractive alternatives which allow for precise control over composition and properties. Among  
68 these, planar supported lipid bilayer systems (SLBs) were widely used (3) but do not account for  
69 cells' three-dimensional nature. Three-dimensional model systems, such as large unilamellar  
70 vesicles (LUVs), giant unilamellar vesicles (GUVs), and cell-derived giant plasma membrane  
71 vesicles (GPMVs) help to recreate cellular curvature but are challenging to use in high-throughput  
72 flow cytometry because of their fragility and size-inhomogeneity.

73 For this reason, we coated cell-sized 5 $\mu$ m silica beads with a lipid bilayer consisting of 98 mole  
74 percent 1-palmitoyl-2-oleoyl-glycero-3-phosphocholine (POPC) doped with 2 mole percent of a  
75 nickelated anchoring lipid (18:1 DGS-NTA(Ni)). Next, we attached His-tagged host-cell proteins  
76 of interest to membrane-coated beads to generate functionalized bead-supported lipid bilayers  
77 (fBSLBs) serving as minimal synthetic host-cells (Fig. 1A). In contrast to methods relying on  
78 random surface-adsorption, fBSLBs ensure proper protein orientation, tightly controllable receptor  
79 mobility and density as well as molecular interactions at the membrane plane. In addition, the  
80 presence of a hydrophobic lipid bilayer more closely mimics the cellular environment and enables  
81 to discriminate between binding preferences of pathogens to either host-cell proteins or lipids. For  
82 example, surface proteins of several viruses can bind different host-cell lipids facilitating cellular  
83 uptake and shaping viral tropism (4).

84 In this study, we show that fBSLBs carrying different host cell receptors, such as angiotensin-  
85 converting enzyme 2 (ACE2), can serve as highly diverse platform to screen for unknown protein-  
86 and lipid-binding molecules, drugs influencing host-pathogen interactions and the blocking  
87 efficiency of neutralizing antibodies present in human serum samples. Its fast implementation, easy  
88 adaptability of multiple parameters and high-throughput capability propel our method as an  
89 important platform to understand and tackle host-pathogen interactions.

## Results

### fBSLBs enable fast and qualitative host-pathogen interaction studies

Upon coating of 5 $\mu$ m silica beads with POPC:DGS-NTA(Ni) 98:2 mole percent of liposome solution, we verified proper bilayer formation by measuring diffusion of a fluorescent lipid analogue using fluorescence correlation spectroscopy (FCS) (fig. S1, A and B), which matched with previous data (5, 6). We first generated fBSLBs carrying ACE2 and studied their interaction with SARS-CoV-2 spike expressing virus-like particles (+S-VLPs) using confocal microscopy (Fig.1, B and C). To quantify VLP-binding per bead we developed an automated image analysis workflow using Fiji (7) (fig. S2). While there was strong interaction between ACE2-fBSLBs and +S-VLPs, it was absent in VLPs with no spike (-S-VLPs) and +S-VLPs pre-treated with SARS-CoV-2 neutralizing spike nanobodies which were shown to be potent tools to neutralize SARS-CoV-2 by blocking the interaction between spike receptor-binding domain (RBD) and its host receptor ACE2 (8, 9). Thus, fBSLBs can serve as powerful screening platform to identify efficient inhibitors with therapeutic potential.

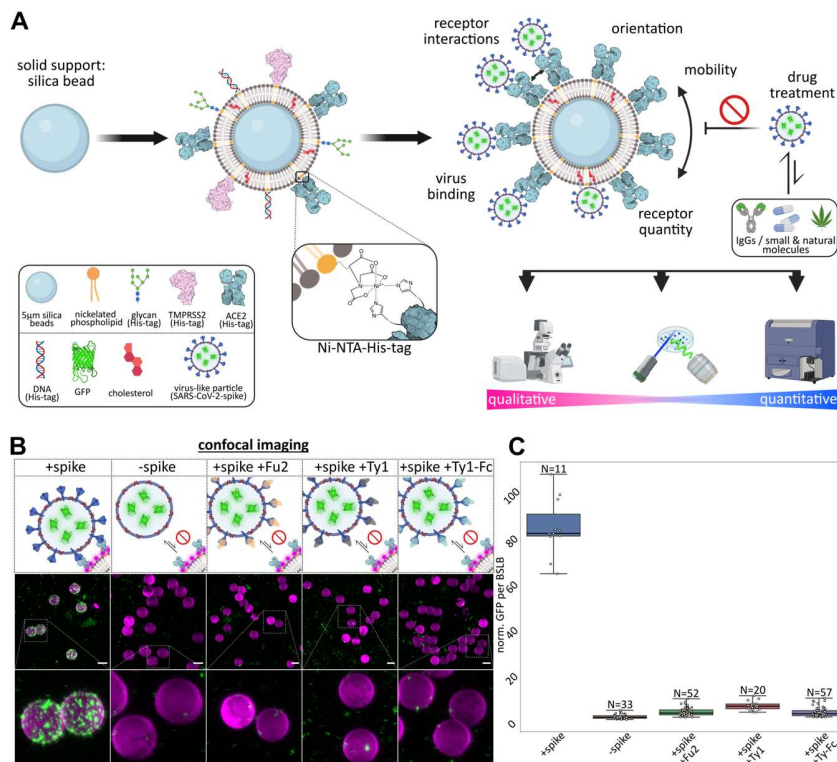

**Fig. 1. Design and characterization of our multi-parametric and high-throughput platform based on fBSLBs to study host-virus interactions.** (A) Scheme depicting the bottom-up assembly of fBSLBs and available readout techniques. (B) LSM maximum-intensity projections of BSLBs (magenta) and VLPs (green) showing specific interaction between SARS-CoV-2 spike VLPs (+S-VLPs) and ACE2-fBSLBs. (C) Quantification of viral GFP-signal per fBSLBs of each condition from (b) shows specific attachment of +S-VLPs to ACE2-fBSLBs (median=84.05 , N=11) and no interaction between -S-VLPs and ACE2-BSLBs (median=2.88 , N=33 ) and nanobody-pretreated +S-VLPs and ACE2-BSLBs (Fu2: median=4.70 , N=52 ; Ty1: median=7.77 , N=20 ; Ty-Fc: median=4.41 , N=57). Boxplot with overlay of individual data points, median as black center line, box showing the quartiles and whiskers from minimum to maximum value. Illustrations were created using Biorender.com and Inkscape.

### fBSLBs enable quantitative high-throughput screening

To increase number of data points and decrease acquisition time, we performed fast, quantitative, 3D lattice light-sheet microscopy (LLSM) and quantified viral loads per fBSLB (Fig. 2, A and B) which confirmed confocal microscopy data. To screen several tens of thousands of fBSLBs within

minutes, fast and high-throughput flow cytometry can be used thanks to the firm nature of fBSLBs. Individual fBSLBs were easily detected by their specific scattering signal and presence of the lipid bilayer confirmed by 1,2-dioleoyl-sn-glycero-3-phosphoethanolamine Abberior STAR RED (ASR-PE) labelling while VLPs were labelled with eGFP. Upon addition of ASR-PE and +S-VLPs to ACE2-fBSLBs, we observed a strong increase of fluorescence intensity per bead both in virus (green) and in membrane (red) channels (Fig. 2C). Moreover, virus signal decreased significantly upon nanobody treatment, confirming the neutralizing ability of nanobodies. Hence, fBSLBs enable to study host-virus interactions using quantitative high-throughput flow cytometry which is usually not feasible due to the small size of viral particles. Moreover, it serves as a powerful platform to study concentration-dependent effects of molecules on the binding between viruses and host-cell receptors. To show this, we determined optimal concentrations of ACE2 on the fBSLBs and the amount +S-VLPs by titration series (fig. S3).

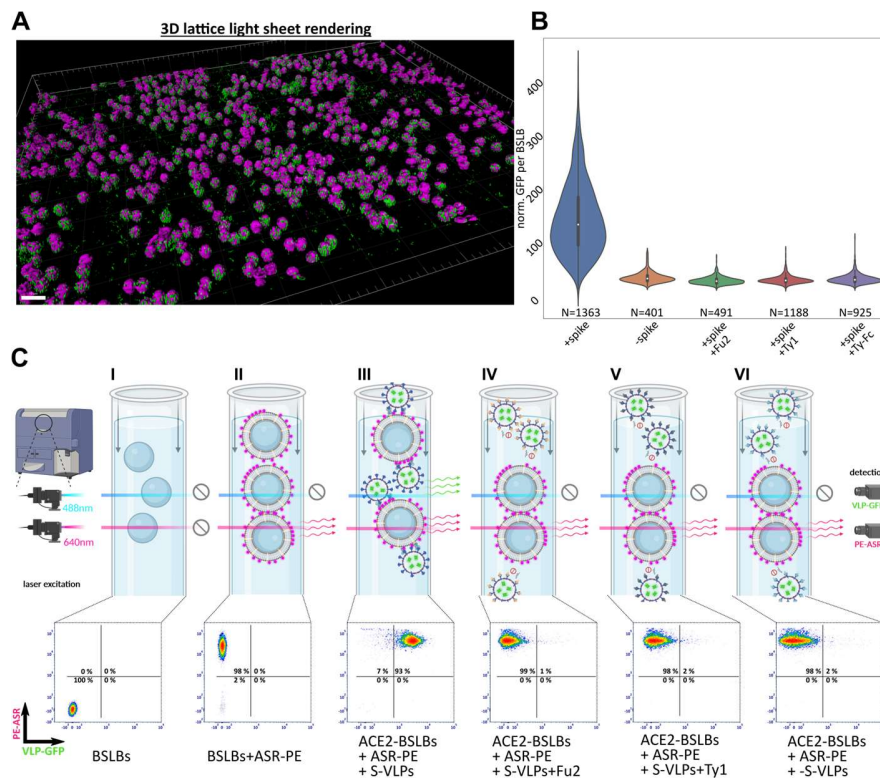

**Fig. 2. High-throughput measurements using fBSLBs.** (A) Fast and quantitative LLSM enabling big-volume renderings of ACE2-fBSLBs (magenta) interacting with +S-VLPs (green). (B) Quantification of VLP-GFP signal per bead proves specific interaction between +S-VLPs and ACE2-fBSLBs (N>400). Violin plot with miniature boxplot showing quartiles and median as white dot. +S-VLPs show significant increased binding to ACE2-fBSLBs as compared to the other groups (p-value<0.0001). (C) Fast high-throughput screening of interaction between VLPs and ACE2-fBSLBs using flow cytometry. Strong signal of the fluorescent lipid ASR-PE (y-axis) confirms functional bilayer formation and interaction of VLPs with fBSLBs can be followed by intensity changes in the VLP-GFP channel (x-axis) (N>8500 per condition). Illustrations were created using Biorender.com and Inkscape.

### Screening receptors using fBSLBs

Besides ACE2, other receptors have been described to contribute to SARS-CoV-2 binding to the host-cell surface and subsequent infection. For this reason, we tested interaction of +S-VLPs with reported host-cell receptors Neuropilin-1 (CD304) (10, 11), Basigin (CD147) (12), DPP4 (CD26) (13, 14) and TMPRSS2 (15, 16) using fBSLBs in combination with flow cytometry. As expected, +S-VLPs showed strongest interaction with ACE2-fBSLBs (Fig. 3A). Interestingly, +S-VLPs also interacted with CD304-fBSLBs and TMPRSS2-fBSLBs, confirming that these two proteins act as

154 host binding factors, but neither interaction was as strong as for ACE2-fBSLBs. No binding was  
 155 observed for CD147-fBSLBs or CD26-fBSLBs, suggesting that these proteins cannot act as host  
 156 binding factors alone and might require additional host-cell binding elements. Notably, CD304-  
 157 fBSLBs binding to VLPs was independent of spike-protein on their surface, e.g., -S-VLPs also  
 158 bound to CD304-fBSLBs effectively while they did not bind any other proteins we tested (Fig. 3B).  
 159 This suggests the presence of another interaction partner on the viral particles to this receptor. To  
 160 check this hypothesis, we performed dual-receptor screens with each individual receptor in absence  
 161 or presence of same molar concentration of ACE2 (Fig. 3C). The presence of ACE2 always  
 162 significantly increased the interaction of +S-VLPs with fBSLBs, but the overall strongest binding  
 163 was observed in the simultaneous presence of CD304 and ACE2, supporting the idea of two  
 164 different additive binding mechanisms.  
 165 fBSLBs allow tight control not only on the composition of surface proteins but also of lipid  
 166 composition. We made use of this and screened for reported lipid co-receptors for spike, such as  
 167 GM1 gangliosides (17). Despite varying GM1 concentrations in fBSLBs, we could not observe any  
 168 concentration-dependent binding of VLPs pseudotyped with spike, beta-spike, delta-spike, Ebola  
 169 virus glycoprotein (GP) or without any viral protein (fig. S4, A and B). These results highlight the  
 170 need for additional high-affinity host-cell binding factors for efficient virus-host interaction.  
 171

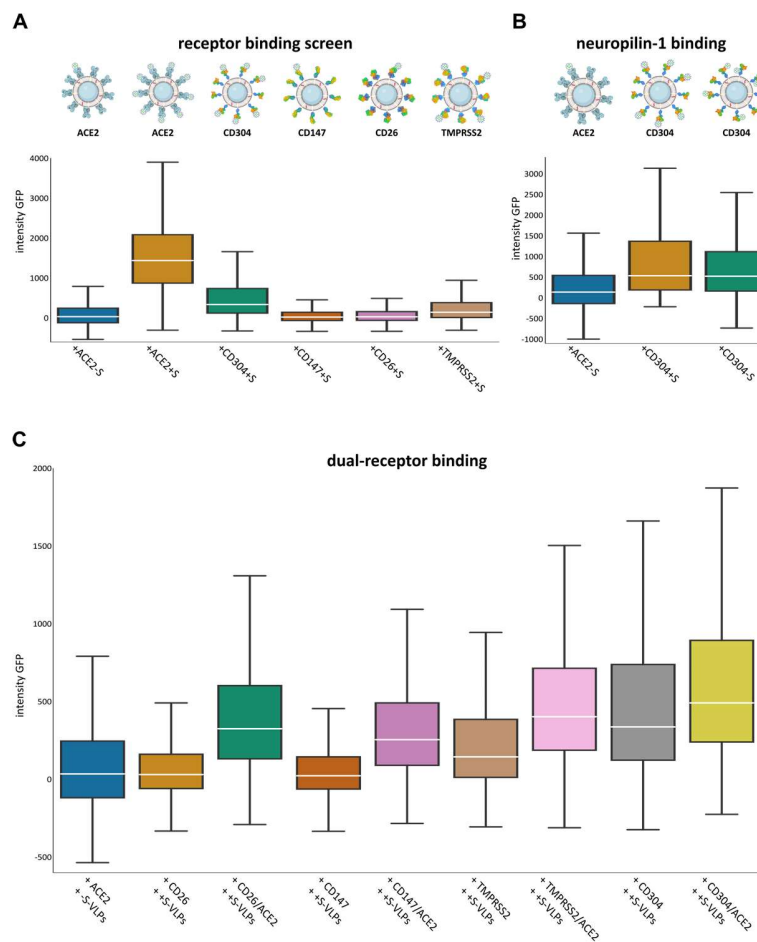

172  
 173 **Fig. 3. Receptor screening using fBSLBs.** (A) Application of fBSLBs to study interaction with different host-  
 174 receptors. Scheme depicting fBSLBs with different His-tagged host-receptors. Box-and-whisker plots showing the  
 175 distribution of +S-VLP-GFP signal of 40000 BSLBs analyzed by flow cytometry. Besides ACE2 (median: 1440),  
 176 specific but less pronounced binding was also observed for CD304 (median: 337) and TMPRSS2 (median: 145). Except  
 177 for the dataset-pair +ACE2-S (blue) and +CD26+S (magenta) all populations are significantly different from each other  
 178 (p-value<0.0001). (B) Interaction of VLPs with CD304-fBSLBs in the absence of spike protein (N=20000). All  
 179 populations are significantly different from each other (p-value<0.0001). (C) Dual receptor screen using fBSLBs and  
 180 flow cytometry. No interaction between +S-VLPs and the host-cell receptors CD26 (median: 31) and CD147 (median:

23) was detected, respectively. Increased interaction with TMPRSS2 (median: 145) and CD304 (Neuropilin-1, median: 337) fBSLBs was observed, respectively. Upon coating BSLBs with 1:1 molar ratio of ACE2 and different host-cell receptors all interactions were further increased while the receptor pairs TMPRSS2/ACE2 (median: 403) and CD304/ACE2 (median: 491) showed strongest binding of +S-VLPs (N=40000 per condition). All populations are significantly different from each other (p-value<0.0001). Box plots show inter-quartile range with white median line and whiskers extend to 1.5 inter-quartile range.

### Surveillance of human serum samples using fBSLBs

Key for pandemic containment is surveillance of convalescent serum samples and their ability to block the interaction between virus and host cell receptors. Virus-specific antibody levels in human serum are usually proportional to neutralization of the virus and can be used to predict disease-outcome or the need for additional booster vaccinations (18, 19). Moreover, it is very important to understand whether anti-viral IgGs in prevalent serum samples still protect from upcoming new variants to decide for vaccine-adjustments and therapeutic treatment options. To show the potential of our method to answer these questions, we first determined the amount of spike-IgGs in three human serum samples using a bead-based assay in combination with flow cytometry (Fig. 4, upper panel). Glass beads were coated with recombinant spike receptor binding domain (RBD), incubated with serum samples, and anti-spike IgGs detected by labelling with secondary dye-conjugated anti-human antibodies. After we determined the relative levels of anti-spike IgGs in the three serum samples, we blocked +S-VLPs with the different serum samples and studied the interaction with ACE2-fBSLBs. The amount of anti-spike IgGs perfectly correlated with the blocking efficiency, highlighting the ability of this method as powerful tool for pandemic surveillance (Fig. 4, lower panel).

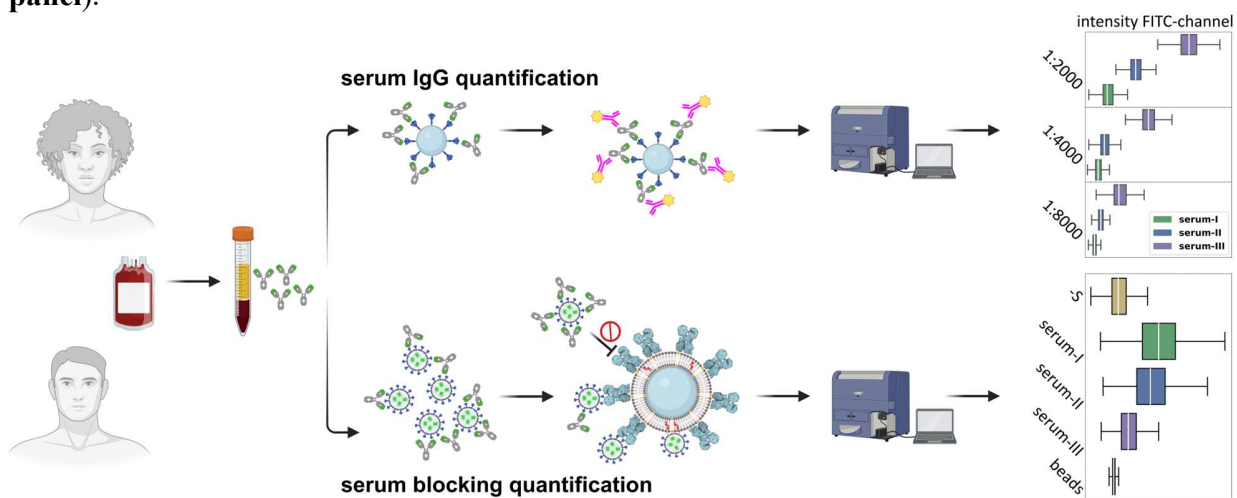

**Fig. 4. Application of fBSLBs to study blocking efficacy of neutralizing antibodies in human blood serum samples.** Scheme showing the processing of human serum samples to quantify amount of anti-spike IgGs and their capacity to block the interaction between +S-VLPs and ACE2-fBSLBs. Upper box plots illustrating the amount of anti-spike IgGs in three different serum samples at different dilutions (N=10000). Lower box plots showing the efficiency to block the interaction between +S-VLPs and ACE2-BSLBs for the three different serum samples of each population (N=10000). Note that the amount of anti-spike-IgGs in the serum samples correlates with blocking efficiency. All populations are significantly different from each other (p-value<0.0001). Box plots show inter-quartile range with white median line and whiskers extend to 1.5 inter-quartile range. Illustrations were created using Biorender.com and Inkscape.

### Discussion

Quick response to pandemic outbreaks is of uttermost importance for disease and damage control. Our platform relies on material and molecules which are available from early pandemic onset, such as the sequence of viral structural proteins and potential interaction partners. Exploiting highly specific Ni-NTA-His-tag conjugation makes the platform highly versatile and accessible, since this

chemistry is widely used for protein purification and His-tagged proteins are available from a myriad of commercial resources. Screening of potential host-cell receptors and co-receptors, including lipids, can be done within a few hours using qualitative and high-throughput quantitative readout platforms. In contrast to other methods, our method enables tight control of multiple cellular parameters such as lipid composition, receptor mobility, receptor orientation, receptor-receptor interactions, and local receptor densities. The platform allows to determine serum-virus neutralization capacity in a safe laboratory environment within hours. Moreover, the presence of a lipid bilayer more closely mimics the cellular environment and can help to entangle the complex interplay between virus-receptor and virus-bilayer interactions which are often difficult to discriminate. Due to its highly defined bottom-up assembly, fBSLBs are not prone to cellular heterogeneity, e.g. due to differences in cell-cycle states, transcription and translation, which can complicate drug screens.

However, this cellular heterogeneity could fine-tune host-pathogen interactions which is challenging to reproduce with our platform. Recent advances on coating beads with native cellular membranes would be an opportunity to recreate this complexity (20, 21). Another limitation of fBSLBs is its inability to initially detect cellular toxic compounds. This can also be advantageous since substances showing both cellular toxicity and binding inhibition are identified and not directly discarded. Further efforts in reducing cellular toxicity while maintaining inhibitory effects of these molecules would be an exciting way to find new drug targets.

Our broadly accessible platform enables to perform fast and high-throughput drug screens and to discriminate whether drugs act on the virus particles or on the host-cell receptors. Due to its bottom-up design, our method should be readily extensible to other biomolecules (e.g. glycocalyx, DNA, RNA) and pathogens (bacteria, fungi) making it a valuable tool for future pandemic preparedness.

## Materials and Methods

### fBSLB preparation

fBSLBs were prepared similar as described previously (6). For preparation of one batch of fBSLBs,  $1 \times 10^7$  5 $\mu$ m silica beads (Bangs Laboratories) were vortexed thoroughly and washed three times with PBS using 1500xg and 30 seconds centrifugation steps. Beads were coated with lipid bilayers of defined compositions by incubation with 100 $\mu$ l 0.5mg/ml liposomes shaking at 1400rpm for 30 minutes. Liposomes were formed by mixing lipids dissolved in chloroform, solvent evaporation under a steam of nitrogen, re-hydration, and tip-sonication (Branson Sonifier 250). To prepare fBSLBs with His-tagged proteins, a lipid mixture consisting of 98mol% 16:0-18:1 POPC and 2mol% 18:1 DGS-Ni:NTA (Avanti Polar Lipids) was used. After bilayer formation beads were washed two more times with PBS and 5pmol of His-tagged proteins added (Sino Biological: ACE2-His 10108-H08H, Neuropilin-1-His 10011-H08H, CD147-His 10186-H08H, CD26-His 10688-H08H). After 20 minutes on a rotary shaker the bilayer of fBSLBs was optionally directly labelled with a fluorescent lipid analogue followed by 2 washing steps with PBS. Final fBSLBs were diluted in 500 $\mu$ l PBS and used the same day. To study host-virus interactions, 20 $\mu$ l of fBSLBs were mixed with 15 $\mu$ l of GFP-tagged pseudotyped VLPs and incubated for 30 minutes on a rotary shaker at room temperature and directly used for microscopy or flow cytometry. Optionally, VLPs were pre-treated for 20 minutes on ice with 2 $\mu$ M Ty1, Ty1-Fc or Fu2 nanobodies<sup>4,5</sup>.

### VLP preparation

Mycoplasma-free HEK293T cells were cultured in DMEM supplemented with 10% FCS and grown to ~70% confluency in T75 cell culture flasks. To produce VLPs, cells were co-transfected using Lipofectamine 3000 and 15 $\mu$ g of DNA encoding for viral protein (pCMV14-3X-Flag-SARS-CoV-2 S was a gift from Zhaohui Qian - Addgene plasmid # 145780; delta/beta spike expression plasmid

271 kindly provided by Benjamin Murrell; Ebola GP expression plasmid kindly provided by Jochen  
272 Bodem), 7.5µg DNA encoding for HIV Vpr-GFP (NIH HIV Reagent Program, Division of AIDS,  
273 NIAID, NIH: pEGFP-Vpr, ARP-11386, contributed by Dr. Warner C. Greene), and 7.5µg encoding  
274 for a lentiviral packaging plasmid (psPAX2 was a gift from Didier Trono - Addgene plasmid #  
275 12260). Media was exchanged after 12 hours and VLPs harvested after 24 and 48 hours and  
276 enriched fiftyfold using LentiX concentrator according to the protocol provided by the  
277 manufacturer (Takara).

### 278 **Microscopy and Quantification**

280 After incubation with pseudotyped VLPs, fBSLBs were put into chambered glass coverslips  
281 (IBIDI: 81817) and imaging performed in PBS. Confocal microscopy was performed using a C-  
282 Apochromat 40x/1.20 water immersion objective of the Zeiss LSM780 microscope. Viral GFP was  
283 excited using 488nm argon laser and membrane-inserted ASR-PE was excited using a 633nm  
284 helium neon laser, while emission was collected from 498-552nm and 641-695nm, respectively.  
285 Full surface of 5µm fBSLBs was recorded by acquiring z-stacks with 24 slices each 0.3µm and  
286 VLP-GFP signal per bead quantified using ImageJ following the provided macro and automated  
287 workflow of Suppl. Fig. 02. To acquire fast, gentle, and big 3D volumes we used LLSM (Zeiss  
288 Lattice Lightsheet 7) with 488nm and 640nm laser excitation for viral GFP and ASR-PE,  
289 respectively. The general analysis workflow followed the one for confocal data, but parameters  
290 were adjusted for differences in signal intensity.

### 291 **Flow Cytometry**

293 Upon interaction of VLPs with fBSLBs the mixture was diluted in 500µl PBS and transferred into  
294 flow tubes. Flow cytometry was performed using a BD Fortessa system acquired at low speed and  
295 488nm (FITC) or 640nm (APC) excitation/emission settings used for VLP-GFP and ASR-PE,  
296 respectively. 10 000 to 20 000 events were acquired and analysed using FCS Express 7 and Python  
297 (FCSParser). Gating was only performed for data shown in Fig. 1f on singlet bead population  
298 clearly visible in the forward- versus side-scatter plot. This population was always at least 85% of  
299 the total bead population.

### 300 **Serum Blocking**

302 Human blood from healthy donors was obtained from blood transfusion station of Karolinska  
303 Hospital and serum prepared by centrifugation. The serum was aliquoted and frozen for further later  
304 use. To determine the amount of anti-spike IgGs in serum samples, 1x10<sup>7</sup> 5µm silica beads (Bangs  
305 Laboratories) were washed three times with PBS and coated for 30 minutes with 47pmol SARS-  
306 CoV-2 RBD (BioSite: 40592-V08H) on a rotary shaker. After two washing steps with PBS beads  
307 were resuspended in 500µl PBS supplemented with 4mg/ml BSA to block non-specific interaction  
308 sites. 20µl of beads were incubated with stated serum dilutions over night at 4°C on a rotary shaker  
309 to enable interaction of anti-spike IgGs with coated beads. After two washing steps, anti-spike IgGs  
310 were labelled by incubation with 4µg/ml secondary anti-human IgG Alexa Fluor 488 antibodies  
311 (ThermoFischer: A11013) for one hour at room temperature on a rotary shaker in the dark. Labelled  
312 beads were washed and signal intensity of at least 9000 beads determined by flow cytometry. To  
313 test serum blocking efficiency, VLPs were pre-treated with stated serum concentrations over night  
314 at 4°C on a rotary shaker before incubated with ACE2-fBSLBs as described above.

### 315 **Statistical Analysis**

317 Visualization and statistical analysis of the data was performed using Python (Anaconda Navigator  
318 2.3.2, JupyterLab 3.2.9) and Kruskal-Wallis H-test with post hoc pairwise test for multiple  
319 comparisons (Dunn's test with Bonferroni one-step correction). Standard error of the median was  
320 estimated by multiplying the standard error of the mean with the constant 1.253.



321  
322 **References**  
323

- 324 1. B. D. Kevadiya, J. Machhi, J. Herskovitz, M. D. Oleynikov, W. R. Blomberg, N. Bajwa, D.  
325 Soni, S. Das, M. Hasan, M. Patel, A. M. Senan, S. Gorantla, J. McMillan, B. Edagwa, R.  
326 Eisenberg, C. B. Gurusurthy, S. P. M. Reid, C. Punyadeera, L. Chang, H. E. Gendelman,  
327 Diagnostics for SARS-CoV-2 infections. *Nat. Mater.* **20**, 593–605 (2021).
- 328 2. H. T. Maecker, J. P. McCoy, R. Nussenblatt, Standardizing immunophenotyping for the  
329 Human Immunology Project. *Nat Rev Immunol.* **12**, 191–200 (2012).
- 330 3. T. Sych, C. O. Gurdap, L. Wedemann, E. Sezgin, How Does Liquid-Liquid Phase Separation  
331 in Model Membranes Reflect Cell Membrane Heterogeneity? *Membranes.* **11**, 323 (2021).
- 332 4. M. Mazzon, J. Mercer, Lipid interactions during virus entry and infection: Lipids and Viruses.  
333 *Cell Microbiol.* **16**, 1493–1502 (2014).
- 334 5. D. Beckers, D. Urbancic, E. Sezgin, Impact of Nanoscale Hindrances on the Relationship  
335 between Lipid Packing and Diffusion in Model Membranes. *J. Phys. Chem. B.* **124**, 1487–  
336 1494 (2020).
- 337 6. P. F. Céspedes, A. Jainarayanan, L. Fernández-Messina, S. Valvo, D. G. Saliba, E. Kurz, A.  
338 Kvalvaag, L. Chen, C. Ganskow, H. Colin-York, M. Fritzsche, Y. Peng, T. Dong, E. Johnson,  
339 J. A. Siller-Farfán, O. Dushek, E. Sezgin, B. Peacock, A. Law, D. Aubert, S. Engledow, M.  
340 Attar, S. Hester, R. Fischer, F. Sánchez-Madrid, M. L. Dustin, T-cell trans-synaptic vesicles  
341 are distinct and carry greater effector content than constitutive extracellular vesicles. *Nat*  
342 *Commun.* **13**, 3460 (2022).
- 343 7. J. Schindelin, I. Arganda-Carreras, E. Frise, V. Kaynig, M. Longair, T. Pietzsch, S. Preibisch,  
344 C. Rueden, S. Saalfeld, B. Schmid, J.-Y. Tinevez, D. J. White, V. Hartenstein, K. Eliceiri, P.  
345 Tomancak, A. Cardona, Fiji: an open-source platform for biological-image analysis. *Nat*  
346 *Methods.* **9**, 676–682 (2012).
- 347 8. L. Hanke, L. Vidakovics Perez, D. J. Sheward, H. Das, T. Schulte, A. Moliner-Morro, M.  
348 Corcoran, A. Achour, G. B. Karlsson Hedestam, B. M. Hällberg, B. Murrell, G. M.  
349 McInerney, An alpaca nanobody neutralizes SARS-CoV-2 by blocking receptor interaction.  
350 *Nat Commun.* **11**, 4420 (2020).
- 351 9. L. Hanke, H. Das, D. J. Sheward, L. Perez Vidakovics, E. Urgard, A. Moliner-Morro, C. Kim,  
352 V. Karl, A. Pankow, N. L. Smith, B. Porebski, O. Fernandez-Capetillo, E. Sezgin, G. K.  
353 Pedersen, J. M. Coquet, B. M. Hällberg, B. Murrell, G. M. McInerney, A bispecific  
354 monomeric nanobody induces spike trimer dimers and neutralizes SARS-CoV-2 in vivo. *Nat*  
355 *Commun.* **13**, 155 (2022).
- 356 10. L. Cantuti-Castelvetri, R. Ojha, L. D. Pedro, M. Djannatian, J. Franz, S. Kuivanen, F. van der  
357 Meer, K. Kallio, T. Kaya, M. Anastasina, T. Smura, L. Levanov, L. Szivovics, A. Tobi, H.  
358 Kallio-Kokko, P. Österlund, M. Joensuu, F. A. Meunier, S. J. Butcher, M. S. Winkler, B.  
359 Mollenhauer, A. Helenius, O. Gokce, T. Teesalu, J. Hepojoki, O. Vapalahti, C. Stadelmann,  
360 G. Balistreri, M. Simons, Neuropilin-1 facilitates SARS-CoV-2 cell entry and infectivity.  
361 *Science.* **370**, 856–860 (2020).

- 362 11. J. L. Daly, B. Simonetti, K. Klein, K.-E. Chen, M. K. Williamson, C. Antón-Plágaro, D. K.  
363 Shoemark, L. Simón-Gracia, M. Bauer, R. Hollandi, U. F. Greber, P. Horvath, R. B. Sessions,  
364 A. Helenius, J. A. Hiscox, T. Teesalu, D. A. Matthews, A. D. Davidson, B. M. Collins, P. J.  
365 Cullen, Y. Yamauchi, Neuropilin-1 is a host factor for SARS-CoV-2 infection. *Science*. **370**,  
366 861–865 (2020).
- 367 12. K. Wang, W. Chen, Z. Zhang, Y. Deng, J.-Q. Lian, P. Du, D. Wei, Y. Zhang, X.-X. Sun, L.  
368 Gong, X. Yang, L. He, L. Zhang, Z. Yang, J.-J. Geng, R. Chen, H. Zhang, B. Wang, Y.-M.  
369 Zhu, G. Nan, J.-L. Jiang, L. Li, J. Wu, P. Lin, W. Huang, L. Xie, Z.-H. Zheng, K. Zhang, J.-L.  
370 Miao, H.-Y. Cui, M. Huang, J. Zhang, L. Fu, X.-M. Yang, Z. Zhao, S. Sun, H. Gu, Z. Wang,  
371 C.-F. Wang, Y. Lu, Y.-Y. Liu, Q.-Y. Wang, H. Bian, P. Zhu, Z.-N. Chen, CD147-spike  
372 protein is a novel route for SARS-CoV-2 infection to host cells. *Sig Transduct Target Ther*. **5**,  
373 283 (2020).
- 374 13. N. Vankadari, J. A. Wilce, Emerging COVID-19 coronavirus: glycan shield and structure  
375 prediction of spike glycoprotein and its interaction with human CD26. *Emerging Microbes &*  
376 *Infections*. **9**, 601–604 (2020).
- 377 14. Y. Li, Z. Zhang, L. Yang, X. Lian, Y. Xie, S. Li, S. Xin, P. Cao, J. Lu, The MERS-CoV  
378 Receptor DPP4 as a Candidate Binding Target of the SARS-CoV-2 Spike. *iScience*. **23**,  
379 101160 (2020).
- 380 15. M. Hoffmann, H. Kleine-Weber, S. Schroeder, N. Krüger, T. Herrler, S. Erichsen, T. S.  
381 Schiergens, G. Herrler, N.-H. Wu, A. Nitsche, M. A. Müller, C. Drosten, S. Pöhlmann,  
382 SARS-CoV-2 Cell Entry Depends on ACE2 and TMPRSS2 and Is Blocked by a Clinically  
383 Proven Protease Inhibitor. *Cell*. **181**, 271-280.e8 (2020).
- 384 16. M. Hussain, N. Jabeen, A. Amanullah, A. Ashraf Baig, B. Aziz, S. Shabbir, F. Raza, N.  
385 Uddin, 1 Bioinformatics and Molecular Medicine Research Group, Dow Research Institute of  
386 Biotechnology and Biomedical Sciences, Dow College of Biotechnology, Dow University of  
387 Health Sciences, Karachi-Pakistan, 2 Department of Microbiology, University of Karachi,  
388 Karachi-Pakistan, 3 Faculty of Computer Science, IBA, Karachi-Pakistan, Molecular docking  
389 between human TMPRSS2 and SARS-CoV-2 spike protein: conformation and intermolecular  
390 interactions. *AIMS Microbiology*. **6**, 350–360 (2020).
- 391 17. L. Nguyen, K. A. McCord, D. T. Bui, K. M. Bouwman, E. N. Kitova, M. Elaish, D.  
392 Kumawat, G. C. Daskhan, I. Tomris, L. Han, P. Chopra, T.-J. Yang, S. D. Willows, A. L.  
393 Mason, L. K. Mahal, T. L. Lowary, L. J. West, S.-T. D. Hsu, T. Hobman, S. M. Tompkins,  
394 G.-J. Boons, R. P. de Vries, M. S. Macauley, J. S. Klassen, Sialic acid-containing glycolipids  
395 mediate binding and viral entry of SARS-CoV-2. *Nat Chem Biol*. **18**, 81–90 (2022).
- 396 18. D. S. Khoury, D. Cromer, A. Reynaldi, T. E. Schlub, A. K. Wheatley, J. A. Juno, K.  
397 Subbarao, S. J. Kent, J. A. Triccas, M. P. Davenport, Neutralizing antibody levels are highly  
398 predictive of immune protection from symptomatic SARS-CoV-2 infection. *Nat Med*. **27**,  
399 1205–1211 (2021).
- 400 19. T. A. Bates, H. C. Leier, Z. L. Lyski, S. K. McBride, F. J. Coulter, J. B. Weinstein, J. R.  
401 Goodman, Z. Lu, S. A. R. Siegel, P. Sullivan, M. Strnad, A. E. Brunton, D. X. Lee, A. C.  
402 Adey, B. N. Bimber, B. J. O’Roak, M. E. Curlin, W. B. Messer, F. G. Tafesse, Neutralization  
403 of SARS-CoV-2 variants by convalescent and BNT162b2 vaccinated serum. *Nat Commun*.  
404 **12**, 5135 (2021).

- 405 20. S. K. Cheppali, R. Dharan, R. Katzenelson, R. Sorkin, *ACS Appl. Mater. Interfaces*, in press,  
406 doi:10.1021/acsami.2c13095.
- 407 21. L. Liu, D. Pan, S. Chen, M.-V. Martikainen, A. Kårlund, J. Ke, H. Pulkkinen, H. Ruhanen, M.  
408 Roponen, R. Käkälä, W. Xu, J. Wang, V.-P. Lehto, Systematic design of cell membrane  
409 coating to improve tumor targeting of nanoparticles. *Nat Commun.* **13**, 6181 (2022).

410  
411  
412  
413

414 **Acknowledgments:**

415 We appreciate the contribution of the National Microscopy Infrastructure, SciLifeLab COVID-19  
416 Research Program, European Union's Horizon 2020 research and innovation program, G2P-UK  
417 National Virology consortium and Barclay Lab at Imperial College for providing the plasmids  
418 Beta/B.1.351 and Delta/B.1.617.2. We thank Jaromir Mikes for support with flow cytometry  
419

420 **Funding:**

421 National Microscopy Infrastructure, NMI, VR-RFI 2016-00968  
422 Knut and Alice Wallenberg Foundation and SciLifeLab, COVID-19 Research Program  
423 European Union's Horizon 2020 research and innovation program, 101003653 (CoroNAb)  
424 G2P-UK National Virology consortium, MRC/UKRI, MR/W005611/1  
425

426 **Author contributions:**

427 Conceptualization: ES, JS  
428 Methodology: ES, JS, BP, LA, LH, SE  
429 Investigation: ES, JS,  
430 Visualization: ES, JS  
431 Supervision: ES, HB, BM, GM, OFC  
432 Writing—original draft: JS, ES  
433 Writing—review & editing: JS, ES, BP, LA, LH, BM, GM, OFC  
434

435 **Competing interests:**

436 Authors declare that they have no competing interests  
437

438 **Data and materials availability:**

439 All raw data will be available upon publication (FigShare DOI: 10.17044/scilifelab.20517336).
